# Supplementary material
Source: PubMed Central journal article supplement (PMC8154633)
Supplement: NIHMS1658495-supplement-1.pdf [file NIHMS1658495-supplement-1.pdf]

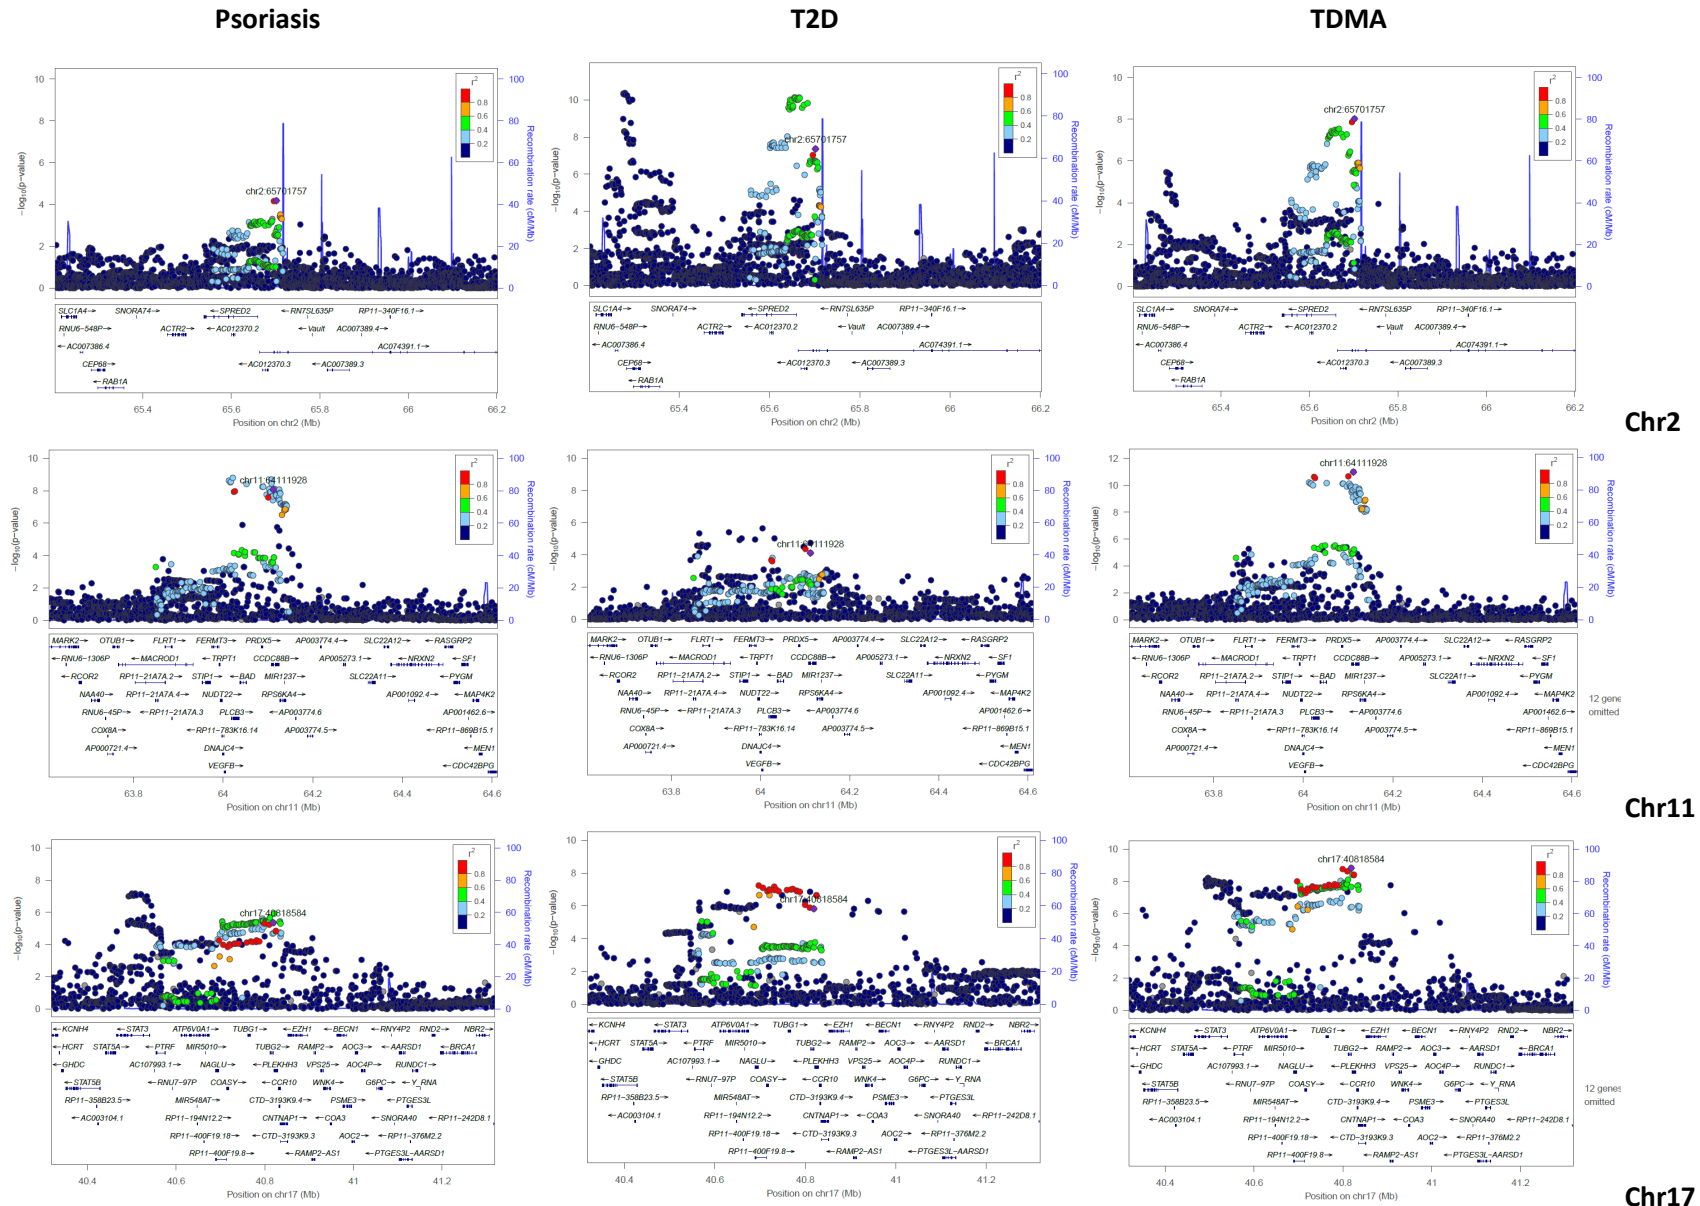

**Supplementary Figure 1:** Regional association plots for the chromosome 2, 11 and 17 loci in psoriasis and T2D (with the lead marker in the trans-disease meta-analysis in purple).

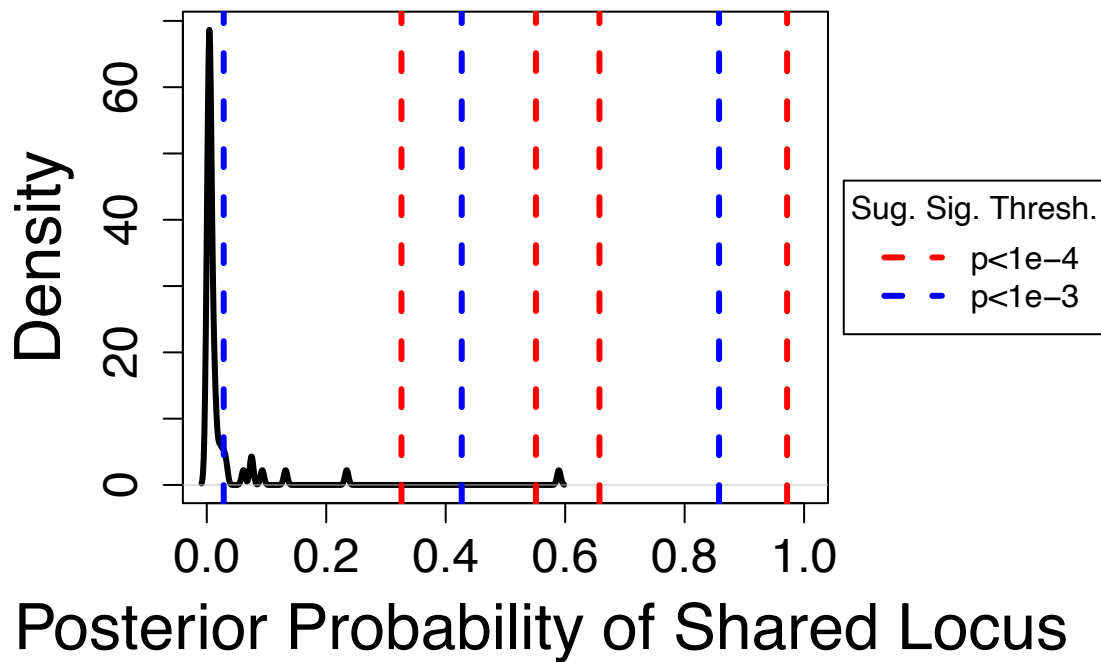

**Supplementary Figure 2: Colocalization posterior probabilities of being a shared locus.** Calculated using COLOC for loci which meet the  $p < 1 \times 10^{-4}$  (red) and  $p < 1 \times 10^{-3}$  (blue) criteria, compared with the 59 other previously reported loci for psoriasis (black).

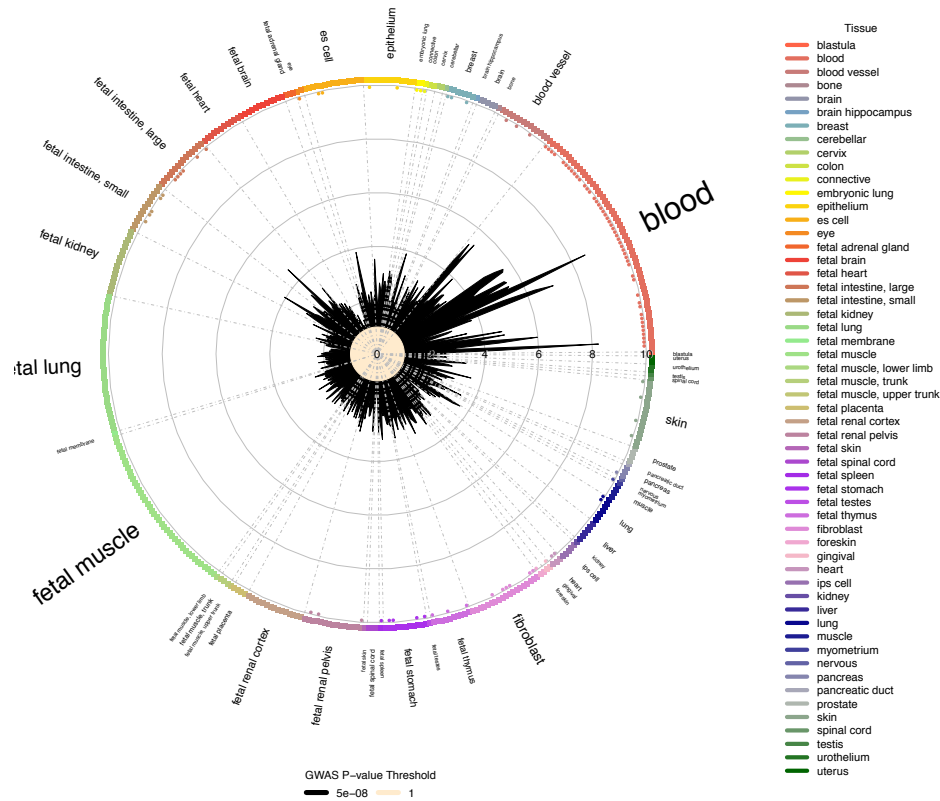

**Supplementary Figure 3: Cell Type Enrichment for Identified Trans-Disease Meta-Analysis (Including the MHC).** Calculated using DNase hotspots in GARFIELD. The strong enrichment of blood tissue illustrates immune-cell involvement.

**Supplementary Table 1: Shared Loci from Trans-Disease Meta-Analysis**

| Marker ID         | Chr       | Position (hg19)  | Alleles (risk/non-risk) | Meta-analysis P-values      |                            |                             | Meta-analysis Odds Ratios |             |             |
|-------------------|-----------|------------------|-------------------------|-----------------------------|----------------------------|-----------------------------|---------------------------|-------------|-------------|
|                   |           |                  |                         | P(Psoriasis)                | P(T2D)                     | P(TDMA)                     | OR(Psoriasis)             | OR(T2D)     | OR(TDMA)    |
| rs438650          | 1         | 8290082          | C/T                     | 1.9x10 <sup>-8</sup>        | 3.4x10 <sup>-1</sup>       | 2.4x10 <sup>-8</sup>        | 1.14                      | 1.01        | 1.07        |
| rs78312791        | 1         | 24513613         | C/A                     | 1.3x10 <sup>-13</sup>       | 2.7x10 <sup>-1</sup>       | 2.3x10 <sup>-13</sup>       | 1.25                      | 1.01        | 1.12        |
| rs11249215        | 1         | 25297184         | A/G                     | 1.9x10 <sup>-14</sup>       | 2.9x10 <sup>-1</sup>       | 6.6x10 <sup>-14</sup>       | 1.16                      | 1.01        | 1.08        |
| rs113935720       | 1         | 67713346         | T/C                     | 7.5x10 <sup>-16</sup>       | 3.1x10 <sup>-1</sup>       | 3.8x10 <sup>-13</sup>       | 1.41                      | 0.99        | 1.18        |
| rs6677595         | 1         | 152590187        | T/C                     | 7.4x10 <sup>-16</sup>       | 8.1x10 <sup>-1</sup>       | 1.0x10 <sup>-13</sup>       | 1.18                      | 1.00        | 1.08        |
| rs35741374        | 2         | 61072567         | T/C                     | 1.2x10 <sup>-15</sup>       | 9.3x10 <sup>-1</sup>       | 1.1x10 <sup>-13</sup>       | 1.17                      | 1.00        | 1.08        |
| <b>rs840967</b>   | <b>2</b>  | <b>65701757</b>  | <b>C/A</b>              | <b>6.6x10<sup>-5</sup></b>  | <b>4.4x10<sup>-8</sup></b> | <b>9.6x10<sup>-9</sup></b>  | <b>1.08</b>               | <b>1.04</b> | <b>1.06</b> |
| rs2111485         | 2         | 163110536        | A/G                     | 4.1x10 <sup>-15</sup>       | 9.9x10 <sup>-1</sup>       | 2.8x10 <sup>-13</sup>       | 1.16                      | 1.00        | 1.08        |
| rs7607980         | 2         | 165551201        | T/C                     | 6.7x10 <sup>-3</sup>        | 8.3x10 <sup>-22</sup>      | 2.1x10 <sup>-8</sup>        | 1.10                      | 1.12        | 1.11        |
| rs3906814         | 3         | 17011474         | C/G                     | 2.4x10 <sup>-10</sup>       | 3.8x10 <sup>-1</sup>       | 2.7x10 <sup>-8</sup>        | 1.13                      | 0.99        | 1.06        |
| rs771576          | 3         | 101616982        | C/T                     | 6.9x10 <sup>-10</sup>       | 7.6x10 <sup>-1</sup>       | 4.9x10 <sup>-9</sup>        | 1.13                      | 1.00        | 1.06        |
| rs4686392         | 3         | 185524081        | G/A                     | 4.7x10 <sup>-2</sup>        | 9.4x10 <sup>-40</sup>      | 1.3x10 <sup>-11</sup>       | 1.04                      | 1.12        | 1.08        |
| <b>rs39841</b>    | <b>5</b>  | <b>96120170</b>  | <b>G/A</b>              | <b>1.3x10<sup>-10</sup></b> | <b>3.8x10<sup>-2</sup></b> | <b>1.7x10<sup>-11</sup></b> | <b>1.14</b>               | <b>1.02</b> | <b>1.08</b> |
| rs1295685         | 5         | 131996445        | A/G                     | 1.5x10 <sup>-15</sup>       | 5.9x10 <sup>-1</sup>       | 4.5x10 <sup>-13</sup>       | 1.21                      | 1.01        | 1.10        |
| rs75851973        | 5         | 150464579        | G/A                     | 2.6x10 <sup>-39</sup>       | 2.1x10 <sup>-1</sup>       | 3.0x10 <sup>-35</sup>       | 1.61                      | 1.02        | 1.28        |
| rs12188300        | 5         | 158829527        | T/A                     | 5.9x10 <sup>-62</sup>       | 2.3x10 <sup>-1</sup>       | 2.4x10 <sup>-56</sup>       | 1.69                      | 1.02        | 1.31        |
| rs7756992         | 6         | 20679709         | G/A                     | 5.4x10 <sup>-3</sup>        | 1.4x10 <sup>-73</sup>      | 2.0x10 <sup>-20</sup>       | 1.06                      | 1.16        | 1.11        |
| rs13214872        | 6         | 31255008         | G/C                     | 6.2x10 <sup>-359</sup>      | 9.4x10 <sup>-1</sup>       | 1.9x10 <sup>-302</sup>      | 2.78                      | 1.00        | 1.67        |
| rs9481169         | 6         | 111929862        | T/G                     | 4.5x10 <sup>-27</sup>       | 7.3x10 <sup>-1</sup>       | 1.3x10 <sup>-22</sup>       | 1.39                      | 1.00        | 1.18        |
| rs582757          | 6         | 138197824        | C/T                     | 6.4x10 <sup>-16</sup>       | 5.6x10 <sup>-1</sup>       | 3.3x10 <sup>-13</sup>       | 1.18                      | 1.00        | 1.08        |
| rs849135          | 7         | 28196413         | G/A                     | 1.8x10 <sup>-1</sup>        | 7.2x10 <sup>-41</sup>      | 5.0x10 <sup>-10</sup>       | 1.03                      | 1.11        | 1.06        |
| rs9650069         | 8         | 118204020        | C/T                     | 6.6x10 <sup>-1</sup>        | 1.5x10 <sup>-50</sup>      | 1.1x10 <sup>-8</sup>        | 1.01                      | 1.13        | 1.07        |
| rs10811660        | 9         | 22134068         | G/A                     | 2.2x10 <sup>-1</sup>        | 5.9x10 <sup>-69</sup>      | 9.6x10 <sup>-12</sup>       | 1.04                      | 1.20        | 1.11        |
| <b>rs11795343</b> | <b>9</b>  | <b>32523737</b>  | <b>T/C</b>              | <b>5.2x10<sup>-8</sup></b>  | <b>1.9x10<sup>-4</sup></b> | <b>1.5x10<sup>-10</sup></b> | <b>1.11</b>               | <b>1.03</b> | <b>1.07</b> |
| <b>rs10761661</b> | <b>10</b> | <b>64525135</b>  | <b>C/T</b>              | <b>4.9x10<sup>-6</sup></b>  | <b>4.1x10<sup>-4</sup></b> | <b>3.4x10<sup>-8</sup></b>  | <b>1.09</b>               | <b>1.03</b> | <b>1.06</b> |
| <b>rs2459446</b>  | <b>10</b> | <b>75601596</b>  | <b>C/T</b>              | <b>1.5x10<sup>-10</sup></b> | <b>3.8x10<sup>-3</sup></b> | <b>1.8x10<sup>-12</sup></b> | <b>1.13</b>               | <b>1.02</b> | <b>1.08</b> |
| <b>rs12265333</b> | <b>10</b> | <b>102011211</b> | <b>A/G</b>              | <b>1.6x10<sup>-6</sup></b>  | <b>7.1x10<sup>-7</sup></b> | <b>1.0x10<sup>-9</sup></b>  | <b>1.12</b>               | <b>1.04</b> | <b>1.08</b> |
| rs35198068        | 10        | 114754784        | C/T                     | 1.8x10 <sup>-1</sup>        | 1.8x10 <sup>-421</sup>     | 9.1x10 <sup>-48</sup>       | 0.97                      | 1.43        | 1.18        |
| rs5215            | 11        | 17408630         | C/T                     | 1.2x10 <sup>-3</sup>        | 9.4x10 <sup>-25</sup>      | 1.4x10 <sup>-11</sup>       | 1.07                      | 1.08        | 1.07        |
| <b>rs685870</b>   | <b>11</b> | <b>64111928</b>  | <b>T/C</b>              | <b>8.5x10<sup>-9</sup></b>  | <b>7.8x10<sup>-5</sup></b> | <b>1.0x10<sup>-11</sup></b> | <b>1.13</b>               | <b>1.03</b> | <b>1.08</b> |
| rs4561177         | 11        | 109962432        | A/G                     | 1.5x10 <sup>-11</sup>       | 9.4x10 <sup>-1</sup>       | 4.1x10 <sup>-10</sup>       | 1.14                      | 1.00        | 1.07        |
| <b>rs10893884</b> | <b>11</b> | <b>128410264</b> | <b>T/C</b>              | <b>1.7x10<sup>-9</sup></b>  | <b>8.1x10<sup>-2</sup></b> | <b>4.4x10<sup>-10</sup></b> | <b>1.12</b>               | <b>1.01</b> | <b>1.07</b> |
| rs76895963        | 12        | 4384844          | T/G                     | 1.8x10 <sup>-1</sup>        | 1.3x10 <sup>-64</sup>      | 3.7x10 <sup>-9</sup>        | 1.15                      | 1.68        | 1.39        |
| rs57137641        | 12        | 56741228         | G/A                     | 9.0x10 <sup>-16</sup>       | 3.7x10 <sup>-1</sup>       | 4.6x10 <sup>-15</sup>       | 1.38                      | 1.01        | 1.18        |
| <b>rs653178</b>   | <b>12</b> | <b>112007756</b> | <b>C/T</b>              | <b>1.7x10<sup>-4</sup></b>  | <b>9.0x10<sup>-8</sup></b> | <b>4.9x10<sup>-8</sup></b>  | <b>1.07</b>               | <b>1.04</b> | <b>1.06</b> |
| <b>rs9591325</b>  | <b>13</b> | <b>50811220</b>  | <b>T/C</b>              | <b>6.6x10<sup>-9</sup></b>  | <b>8.1x10<sup>-3</sup></b> | <b>2.1x10<sup>-10</sup></b> | <b>1.24</b>               | <b>1.04</b> | <b>1.14</b> |
| rs12884468        | 14        | 35852486         | C/T                     | 7.3x10 <sup>-15</sup>       | 6.2x10 <sup>-1</sup>       | 1.8x10 <sup>-12</sup>       | 1.16                      | 1.00        | 1.08        |
| rs2199036         | 16        | 31006972         | T/C                     | 1.0x10 <sup>-11</sup>       | 8.2x10 <sup>-1</sup>       | 4.7x10 <sup>-10</sup>       | 1.14                      | 1.00        | 1.07        |
| rs17817712        | 16        | 53821125         | G/A                     | 2.2x10 <sup>-4</sup>        | 1.9x10 <sup>-12</sup>      | 1.9x10 <sup>-9</sup>        | 1.07                      | 1.05        | 1.06        |
| rs28998802        | 17        | 26124908         | A/G                     | 2.0x10 <sup>-16</sup>       | 7.5x10 <sup>-1</sup>       | 1.3x10 <sup>-14</sup>       | 1.24                      | 1.00        | 1.12        |
| <b>rs2292749</b>  | <b>17</b> | <b>40818584</b>  | <b>T/C</b>              | <b>4.4x10<sup>-6</sup></b>  | <b>1.5x10<sup>-6</sup></b> | <b>1.5x10<sup>-9</sup></b>  | <b>1.10</b>               | <b>1.04</b> | <b>1.07</b> |
| rs34536443        | 19        | 10463118         | G/C                     | 9.4x10 <sup>-30</sup>       | 2.6x10 <sup>-1</sup>       | 8.0x10 <sup>-29</sup>       | 1.95                      | 1.02        | 1.41        |
| rs6063454         | 20        | 48590791         | G/T                     | 3.1x10 <sup>-16</sup>       | 8.0x10 <sup>-1</sup>       | 1.2x10 <sup>-14</sup>       | 1.17                      | 1.00        | 1.08        |

Abbreviations are as follows: Chr, chromosome; OR, odds ratio; p, p-value; TDMA, trans-disease meta-analysis. Loci with lower p-value in trans-disease meta-analysis than either trait are marked in **bold**, of which those suggestive significant ( $p < 1 \times 10^{-4}$ ) in both traits are marked in **red**.

**Supplementary Table 2: Opposing Loci from Trans-Disease Meta-Analysis**

| Marker ID        | Chr       | Position (hg19)  | Alleles (risk/non-risk) | Meta-analysis P-values      |                            |                             | Meta-analysis Odds Ratios |             |             |
|------------------|-----------|------------------|-------------------------|-----------------------------|----------------------------|-----------------------------|---------------------------|-------------|-------------|
|                  |           |                  |                         | P(Psoriasis)                | P(T2D)                     | P(TDMA)                     | OR(Psoriasis)             | OR(T2D)     | OR(TDMA)    |
| rs4649201        | 1         | 24509435         | G/A                     | 2.1x10 <sup>-13</sup>       | 5.0x10 <sup>-1</sup>       | 2.8x10 <sup>-11</sup>       | 1.25                      | 1.01        | 1.11        |
| rs6672420        | 1         | 25291010         | T/A                     | 8.8x10 <sup>-15</sup>       | 4.8x10 <sup>-1</sup>       | 3.4x10 <sup>-12</sup>       | 1.16                      | 1.01        | 1.07        |
| rs113935720      | 1         | 67713346         | T/C                     | 7.5x10 <sup>-16</sup>       | 3.1x10 <sup>-1</sup>       | 2.2x10 <sup>-15</sup>       | 1.41                      | 0.99        | 1.19        |
| rs11205044       | 1         | 152593437        | C/T                     | 6.3x10 <sup>-16</sup>       | 7.4x10 <sup>-1</sup>       | 1.8x10 <sup>-14</sup>       | 1.18                      | 1.00        | 1.09        |
| rs340874         | 1         | 214159256        | C/T                     | 3.0x10 <sup>-2</sup>        | 4.8x10 <sup>-21</sup>      | 3.2x10 <sup>-8</sup>        | 0.96                      | 1.07        | 1.06        |
| rs6544662        | 2         | 43712093         | C/A                     | 4.6x10 <sup>-1</sup>        | 5.1x10 <sup>-22</sup>      | 2.6x10 <sup>-8</sup>        | 0.98                      | 1.19        | 1.10        |
| rs35741374       | 2         | 61072567         | T/C                     | 1.2x10 <sup>-15</sup>       | 9.3x10 <sup>-1</sup>       | 6.6x10 <sup>-14</sup>       | 1.17                      | 1.00        | 1.08        |
| <b>rs4672505</b> | <b>2</b>  | <b>62560332</b>  | <b>A/G</b>              | <b>1.9x10<sup>-8</sup></b>  | <b>3.1x10<sup>-2</sup></b> | <b>1.6x10<sup>-9</sup></b>  | <b>1.12</b>               | <b>0.98</b> | <b>1.07</b> |
| rs1990760        | 2         | 163124051        | T/C                     | 5.7x10 <sup>-15</sup>       | 8.8x10 <sup>-1</sup>       | 2.2x10 <sup>-13</sup>       | 1.16                      | 1.00        | 1.08        |
| rs3906814        | 3         | 17011474         | C/G                     | 2.4x10 <sup>-10</sup>       | 3.8x10 <sup>-1</sup>       | 5.4x10 <sup>-10</sup>       | 1.13                      | 0.99        | 1.07        |
| rs771576         | 3         | 101616982        | C/T                     | 6.9x10 <sup>-10</sup>       | 7.6x10 <sup>-1</sup>       | 1.9x10 <sup>-8</sup>        | 1.13                      | 1.00        | 1.06        |
| rs1295685        | 5         | 131996445        | G/A                     | 1.5x10 <sup>-15</sup>       | 5.9x10 <sup>-1</sup>       | 2.2x10 <sup>-14</sup>       | 1.21                      | 0.99        | 1.10        |
| rs2233278        | 5         | 150467189        | C/G                     | 2.3x10 <sup>-39</sup>       | 2.2x10 <sup>-1</sup>       | 5.0x10 <sup>-30</sup>       | 1.61                      | 1.02        | 1.26        |
| rs62377586       | 5         | 158766022        | G/A                     | 3.5x10 <sup>-54</sup>       | 2.3x10 <sup>-1</sup>       | 3.1x10 <sup>-50</sup>       | 1.38                      | 0.99        | 1.18        |
| rs6928012        | 6         | 20728513         | C/T                     | 1.7x10 <sup>-5</sup>        | 8.6x10 <sup>-20</sup>      | 2.4x10 <sup>-13</sup>       | 0.92                      | 1.07        | 1.08        |
| rs10484554       | 6         | 31274555         | T/C                     | 7.5x10 <sup>-358</sup>      | 9.1x10 <sup>-1</sup>       | 1.9x10 <sup>-302</sup>      | 2.78                      | 1.00        | 1.67        |
| rs9481169        | 6         | 111929862        | T/G                     | 4.5x10 <sup>-27</sup>       | 7.3x10 <sup>-1</sup>       | 7.9x10 <sup>-24</sup>       | 1.39                      | 1.00        | 1.18        |
| rs610604         | 6         | 138199417        | G/T                     | 8.5x10 <sup>-16</sup>       | 4.6x10 <sup>-1</sup>       | 8.6x10 <sup>-15</sup>       | 1.17                      | 0.99        | 1.09        |
| <b>rs1838488</b> | <b>9</b>  | <b>75332795</b>  | <b>C/T</b>              | <b>2.0x10<sup>-6</sup></b>  | <b>1.8x10<sup>-3</sup></b> | <b>4.4x10<sup>-8</sup></b>  | <b>1.12</b>               | <b>0.98</b> | <b>1.07</b> |
| <b>rs1108617</b> | <b>10</b> | <b>81043573</b>  | <b>A/G</b>              | <b>2.8x10<sup>-10</sup></b> | <b>3.0x10<sup>-2</sup></b> | <b>3.1x10<sup>-11</sup></b> | <b>1.13</b>               | <b>0.98</b> | <b>1.07</b> |
| rs10882102       | 10        | 94466495         | G/C                     | 1.7x10 <sup>-4</sup>        | 2.4x10 <sup>-57</sup>      | 1.6x10 <sup>-20</sup>       | 0.93                      | 1.13        | 1.10        |
| rs35198068       | 10        | 114754784        | C/T                     | 1.8x10 <sup>-1</sup>        | 1.8x10 <sup>-421</sup>     | 5.3x10 <sup>-65</sup>       | 0.97                      | 1.43        | 1.21        |
| rs1648153        | 11        | 109959638        | G/A                     | 1.6x10 <sup>-11</sup>       | 9.3x10 <sup>-1</sup>       | 2.7x10 <sup>-10</sup>       | 1.14                      | 1.00        | 1.07        |
| <b>rs7108992</b> | <b>11</b> | <b>128381867</b> | <b>A/C</b>              | <b>6.9x10<sup>-8</sup></b>  | <b>4.7x10<sup>-2</sup></b> | <b>7.8x10<sup>-9</sup></b>  | <b>1.11</b>               | <b>0.98</b> | <b>1.06</b> |
| rs111885088      | 12        | 56657216         | A/C                     | 1.1x10 <sup>-15</sup>       | 4.1x10 <sup>-1</sup>       | 4.4x10 <sup>-13</sup>       | 1.38                      | 1.01        | 1.17        |
| rs74899623       | 13        | 50794228         | G/A                     | 1.7x10 <sup>-8</sup>        | 3.9x10 <sup>-1</sup>       | 2.5x10 <sup>-8</sup>        | 1.34                      | 0.98        | 1.17        |
| rs8016947        | 14        | 35832666         | G/T                     | 3.8x10 <sup>-14</sup>       | 2.6x10 <sup>-1</sup>       | 9.3x10 <sup>-14</sup>       | 1.15                      | 0.99        | 1.08        |
| rs413024         | 16        | 11354091         | A/G                     | 1.2x10 <sup>-8</sup>        | 6.4x10 <sup>-1</sup>       | 4.2x10 <sup>-8</sup>        | 1.13                      | 1.00        | 1.06        |
| rs4889526        | 16        | 31030344         | A/C                     | 8.5x10 <sup>-12</sup>       | 6.1x10 <sup>-1</sup>       | 6.0x10 <sup>-11</sup>       | 1.14                      | 1.00        | 1.07        |
| rs28998802       | 17        | 26124908         | A/G                     | 2.0x10 <sup>-16</sup>       | 7.5x10 <sup>-1</sup>       | 7.9x10 <sup>-14</sup>       | 1.24                      | 1.00        | 1.11        |
| rs34536443       | 19        | 10463118         | G/C                     | 9.4x10 <sup>-30</sup>       | 2.6x10 <sup>-1</sup>       | 1.8x10 <sup>-25</sup>       | 1.95                      | 1.02        | 1.38        |
| rs6063454        | 20        | 48590791         | G/T                     | 3.1x10 <sup>-16</sup>       | 8.0x10 <sup>-1</sup>       | 5.1x10 <sup>-14</sup>       | 1.17                      | 1.00        | 1.08        |

Abbreviations are as follows: Chr, chromosome; OR, odds ratio; p, p-value; TDMA, trans-disease meta-analysis. Risk alleles and effect sizes are given with respect to the trait with more significant p-value for each marker. Loci with lower p-value in trans-disease meta-analysis than either trait are indicated in **bold**, of which none are suggestive significant ( $p < 1 \times 10^{-4}$ ) in both traits.

**Supplementary Table 3: Top 5 Histone Modifications and DNase Hotspots with Most Enrichment**

| <b>Enrichment<br/>p-Value</b> | <b>Cell type</b> | <b>Enrichment<br/>Mark</b> |
|-------------------------------|------------------|----------------------------|
| 1.3x10 <sup>-7</sup>          | HeLa S3          | H3K4me2                    |
| 1.5x10 <sup>-7</sup>          | GM12878          | H3K9ac                     |
| 6.4x10 <sup>-7</sup>          | GM12878          | H3K4me3                    |
| 9.7x10 <sup>-7</sup>          | GM12878          | H3K4me1                    |
| 1.6x10 <sup>-6</sup>          | GM12878          | H3K79me2                   |

**Supplementary Table 4: Bayesian Credible Set Sizes (95% Confidence Interval)**

| Lead Marker ID | Chr | Position (hg19) | Alleles (risk/non-risk) | Credible Set Sizes |     |      |           |
|----------------|-----|-----------------|-------------------------|--------------------|-----|------|-----------|
|                |     |                 |                         | Psoriasis          | T2D | TDMA | Intersect |
| rs840967       | 2   | 65701757        | C/A                     | 2,195              | 33  | 27   | 24        |
| rs12265333     | 10  | 102011211       | A/G                     | 46                 | 62  | 20   | 20        |
| rs685870       | 11  | 64111928        | T/C                     | 31                 | 37  | 27   | 4         |
| rs2292749      | 17  | 40818584        | T/C                     | 60                 | 104 | 184  | 2         |

Abbreviations are as follows: Chr, chromosome; T2D, type 2 diabetes; TDMA, trans-disease meta-analysis.

**Supplementary Table 5: Bayesian Credible Sets intersected in the TDMA and individual trait meta-analysis (95% Confidence Interval)**

| Marker ID  | Chr | Position (hg19) | Alleles (risk/non-risk) | P-value (TDMA)       | OR (TDMA) | Raw CADD score | PHRED-Scaled CADD score | GM12878 Overlap annotation <sup>a</sup> |
|------------|-----|-----------------|-------------------------|----------------------|-----------|----------------|-------------------------|-----------------------------------------|
| rs6731993  | 2   | 65642097        | A/T                     | 8.3x10 <sup>-8</sup> | 1.06      | -0.059         | 1.84                    | 000000                                  |
| rs7557569  | 2   | 65644561        | T/C                     | 6.3x10 <sup>-8</sup> | 1.06      | -0.029         | 2.20                    | 001010                                  |
| rs62141075 | 2   | 65644616        | C/T                     | 7.1x10 <sup>-8</sup> | 1.06      | 0.224          | 6.18                    | 001010                                  |
| rs13383320 | 2   | 65645137        | C/A                     | 5.8x10 <sup>-8</sup> | 1.06      | 0.161          | 5.25                    | 101010                                  |
| rs10166100 | 2   | 65645750        | C/T                     | 6.3x10 <sup>-8</sup> | 1.06      | -0.281         | 0.42                    | 001010                                  |
| rs10166362 | 2   | 65645774        | G/A                     | 6.0x10 <sup>-8</sup> | 1.06      | -0.234         | 0.57                    | 001000                                  |
| rs7565437  | 2   | 65646966        | T/C                     | 5.8x10 <sup>-8</sup> | 1.06      | 0.177          | 5.49                    | 000000                                  |
| rs10153675 | 2   | 65649580        | G/A                     | 3.8x10 <sup>-8</sup> | 1.06      | 0.380          | 8.17                    | 000000                                  |
| rs55792977 | 2   | 65650864        | G/T                     | 4.7x10 <sup>-8</sup> | 1.06      | -0.142         | 1.05                    | 000000                                  |
| rs12470883 | 2   | 65651851        | G/A                     | 4.6x10 <sup>-8</sup> | 1.06      | 0.119          | 4.58                    | 000000                                  |
| rs7572922  | 2   | 65652156        | C/T                     | 4.1x10 <sup>-8</sup> | 1.06      | -0.013         | 2.43                    | 000000                                  |
| rs2028150  | 2   | 65655012        | C/G                     | 4.0x10 <sup>-8</sup> | 1.06      | 0.291          | 7.09                    | 000000                                  |
| rs2028151  | 2   | 65655613        | A/T                     | 4.8x10 <sup>-8</sup> | 1.06      | 1.702          | 16.80                   | 000100                                  |
| rs7569257  | 2   | 65656976        | G/A                     | 3.3x10 <sup>-8</sup> | 1.06      | 0.186          | 5.63                    | 101111                                  |
| rs7569113  | 2   | 65657041        | C/T                     | 4.1x10 <sup>-8</sup> | 1.06      | 0.372          | 8.08                    | 101111                                  |
| rs12185577 | 2   | 65659488        | A/G                     | 4.7x10 <sup>-8</sup> | 1.06      | 0.363          | 7.98                    | 111101                                  |
| rs12185610 | 2   | 65661468        | A/C                     | 3.2x10 <sup>-8</sup> | 1.06      | -0.075         | 1.66                    | 000000                                  |
| rs1807337  | 2   | 65663167        | G/C                     | 3.5x10 <sup>-8</sup> | 1.06      | 1.282          | 14.84                   | 111101                                  |
| rs1437466  | 2   | 65664350        | C/T                     | 3.7x10 <sup>-8</sup> | 1.06      | 0.576          | 10.07                   | 111101                                  |
| rs2860773  | 2   | 65665641        | G/T                     | 3.0x10 <sup>-8</sup> | 1.06      | 0.062          | 3.63                    | 000000                                  |
| rs6752053  | 2   | 65666674        | T/C                     | 2.9x10 <sup>-8</sup> | 1.06      | 0.288          | 7.06                    | 000000                                  |
| rs62141115 | 2   | 65672192        | A/G                     | 5.0x10 <sup>-8</sup> | 1.06      | 0.314          | 7.40                    | 000000                                  |
| rs6546151  | 2   | 65676583        | G/A                     | 7.2x10 <sup>-8</sup> | 1.06      | -0.477         | 0.10                    | 000000                                  |
| rs10184881 | 2   | 65684152        | A/G                     | 5.4x10 <sup>-8</sup> | 1.06      | -0.036         | 2.11                    | 000000                                  |
| rs10786583 | 10  | 101946014       | C/G                     | 1.2x10 <sup>-8</sup> | 1.07      | 0.382          | 8.19                    | 111111                                  |
| rs7923726  | 10  | 101963299       | G/T                     | 1.2x10 <sup>-9</sup> | 1.08      | -0.450         | 0.13                    | 000000                                  |
| rs7909855  | 10  | 101967212       | C/G                     | 1.4x10 <sup>-8</sup> | 1.07      | 0.191          | 5.71                    | 000000                                  |
| rs12269373 | 10  | 101972378       | T/C                     | 1.5x10 <sup>-9</sup> | 1.08      | -0.182         | 0.81                    | 000000                                  |
| rs7898075  | 10  | 101973097       | T/C                     | 1.5x10 <sup>-9</sup> | 1.08      | -0.303         | 0.36                    | 000000                                  |
| rs34136767 | 10  | 101973388       | T/C                     | 1.5x10 <sup>-9</sup> | 1.08      | 0.339          | 7.70                    | 000000                                  |
| rs2230804  | 10  | 101977883       | C/T                     | 1.4x10 <sup>-8</sup> | 1.07      | 2.206          | 21.40                   | 000000                                  |
| rs7905395  | 10  | 101996286       | C/T                     | 2.5x10 <sup>-9</sup> | 1.07      | 0.210          | 5.99                    | 000000                                  |
| rs7905302  | 10  | 101996295       | A/G                     | 2.3x10 <sup>-9</sup> | 1.07      | 0.087          | 4.05                    | 000000                                  |
| rs4917889  | 10  | 101999394       | A/G                     | 8.1x10 <sup>-9</sup> | 1.07      | -0.316         | 0.33                    | 000000                                  |
| rs4919438  | 10  | 102006429       | T/C                     | 8.1x10 <sup>-9</sup> | 1.07      | 0.084          | 3.99                    | 000000                                  |
| rs6584354  | 10  | 102007714       | A/C                     | 1.2x10 <sup>-9</sup> | 1.08      | 0.024          | 3.01                    | 000000                                  |
| rs7079072  | 10  | 102008169       | C/G                     | 1.1x10 <sup>-9</sup> | 1.08      | 0.409          | 8.49                    | 000000                                  |
| rs12265333 | 10  | 102011211       | A/G                     | 1.0x10 <sup>-9</sup> | 1.08      | 0.873          | 12.40                   | 000000                                  |
| rs2270961  | 10  | 102016268       | G/A                     | 1.1x10 <sup>-8</sup> | 1.07      | 0.786          | 11.76                   | 000000                                  |
| rs7922807  | 10  | 102023006       | C/T                     | 1.2x10 <sup>-9</sup> | 1.08      | 0.059          | 3.59                    | 000010                                  |
| rs7922807  | 10  | 102028467       | T/C                     | 1.4x10 <sup>-9</sup> | 1.08      | 0.017          | 2.89                    | 001000                                  |
| rs12254005 | 10  | 102038685       | T/A                     | 1.6x10 <sup>-9</sup> | 1.08      | 0.043          | 3.31                    | 000000                                  |
| rs4919446  | 10  | 102039458       | G/A                     | 1.7x10 <sup>-9</sup> | 1.08      | 0.246          | 6.50                    | 000000                                  |
| rs4917896  | 10  | 102039463       | T/C                     | 1.5x10 <sup>-9</sup> | 1.08      | 0.317          | 7.44                    | 000000                                  |



**Supplementary Table 5: Bayesian Credible Sets (95% Confidence Interval) *continued***

| Marker ID  | Chr | Position (hg19) | Alleles (risk/non-risk) | P-value (TDMA)        | OR (TDMA) | Raw CADD score | PHRED-Scaled CADD score | GM12878 Overlap annotation <sup>a</sup> |
|------------|-----|-----------------|-------------------------|-----------------------|-----------|----------------|-------------------------|-----------------------------------------|
| rs588177   | 11  | 64024056        | C/A                     | 2.4x10 <sup>-11</sup> | 1.08      | 0.091          | 4.12                    | 000000                                  |
| rs2244625  | 11  | 64026144        | G/A                     | 2.9x10 <sup>-11</sup> | 1.08      | 0.250          | 6.55                    | 000000                                  |
| rs1662185  | 11  | 64100776        | A/G                     | 2.2x10 <sup>-11</sup> | 1.08      | 0.188          | 5.66                    | 000000                                  |
| rs685870   | 11  | 64111928        | T/C                     | 1.0x10 <sup>-11</sup> | 1.08      | -0.223         | 0.61                    | 000000                                  |
| rs66918837 | 17  | 40799633        | A/G                     | 1.8x10 <sup>-9</sup>  | 1.07      | -0.262         | 0.47                    | 000000                                  |
| rs2292749  | 17  | 40818584        | T/C                     | 1.5x10 <sup>-9</sup>  | 1.07      | 0.559          | 9.91                    | 000000                                  |

Abbreviations are as follows: Chr, chromosome; TDMA, trans-disease meta-analysis; CADD, Combined Annotation Dependent Depletion. <sup>a</sup>Indicates whether marker overlaps (1) or does not overlap (0) GM12878 (lymphoblastoid) cell type annotations using the following 6 marks: DNase-seq, H3K27ac, H3K4me2, H3K4me3, H3K79me2, H3K9ac.

**Supplementary Table 6: Significant eQTLs for Markers in Intersection of Bayesian Credible Sets**

| Gene                 | Chr | pHi-C   | eQTLGen      |                        |      | NESDA/NTR    |                       |      | GeneNetwork  |                        |
|----------------------|-----|---------|--------------|------------------------|------|--------------|-----------------------|------|--------------|------------------------|
|                      |     |         | Marker       | P-value                | OR   | Marker       | P-value               | OR   | Marker       | P-value                |
| <i>ACTR2</i>         | 2   | +++++++ |              |                        |      | rs7557569-T  | 1.1x10 <sup>-19</sup> | 1.18 |              |                        |
| <i>CEP68</i>         | 2   | +++++++ | rs6752053-C  | 1.5x10 <sup>-5</sup>   | 1.04 |              |                       |      |              |                        |
| <i>SPRED2</i>        | 2   | +++++++ | rs10153675-G | 3.3x10 <sup>-5</sup>   | 1.14 |              |                       |      | rs7557569-T  | 2.4x10 <sup>-3</sup>   |
| <i>BLOC1S2</i>       | 10  | +++++++ | rs10786583-G | 4.4x10 <sup>-23</sup>  | 1.08 | rs7922807-T  | 1.3x10 <sup>-21</sup> | 1.20 |              |                        |
| <i>CHUK</i>          | 10  | ++-+++  | rs10786583-G | 4.3x10 <sup>-19</sup>  | 1.07 |              |                       |      | rs12254005-A | 2.3x10 <sup>-6</sup>   |
| <i>CWF19L1</i>       | 10  | +++++++ | rs10786583-G | 3.3x10 <sup>-310</sup> | 1.63 | rs6584354-C  | 6.2x10 <sup>-9</sup>  | 1.12 | rs7922807-T  | 2.2x10 <sup>-152</sup> |
| <i>DNMBP</i>         | 10  | +++++++ | rs10786583-G | 2.90x10 <sup>-6</sup>  | 1.04 |              |                       |      |              |                        |
| <i>ERLIN1</i>        | 10  | +++++++ | rs10786583-C | 6.3x10 <sup>-21</sup>  | 1.08 | rs4919438-T  | 2.3x10 <sup>-9</sup>  | 1.12 |              |                        |
| <i>PHBP9</i>         | 10  | -----   | rs10786583-G | 2.0x10 <sup>-26</sup>  | 1.09 |              |                       |      |              |                        |
| <i>PKD2L1</i>        | 10  | ++-+++  | rs10786583-G | 2.3x10 <sup>-27</sup>  | 1.09 |              |                       |      |              |                        |
| <i>RP11-316M21.6</i> | 10  | ++-+++  | rs10786583-G | 3.1x10 <sup>-13</sup>  | 1.06 |              |                       |      |              |                        |
| <i>AP003774.1</i>    | 11  | -----   | rs1662185-G  | 3.3x10 <sup>-310</sup> | 1.41 |              |                       |      |              |                        |
| <i>AP003774.4</i>    | 11  | ++-+++  | rs1662185-G  | 5.2x10 <sup>-6</sup>   | 1.04 |              |                       |      |              |                        |
| <i>AP003774.6</i>    | 11  | -----   | rs1662185-G  | 3.5x10 <sup>-45</sup>  | 1.13 |              |                       |      |              |                        |
| <i>CCDC88B</i>       | 11  | +----+  | rs1662185-A  | 1.8x10 <sup>-219</sup> | 1.31 |              |                       |      |              |                        |
| <i>FERMT3</i>        | 11  | +++++++ | rs1662185-G  | 1.5x10 <sup>-8</sup>   | 1.05 |              |                       |      |              |                        |
| <i>GPR137</i>        | 11  | ++++++  | rs1662185-A  | 3.2x10 <sup>-40</sup>  | 1.12 |              |                       |      | rs2244625-G  | 4.8x10 <sup>-25</sup>  |
| <i>PLA2G16</i>       | 11  | ----++  | rs1662185-G  | 4.2x10 <sup>-14</sup>  | 1.07 |              |                       |      |              |                        |
| <i>PLCB3</i>         | 11  | ++-+++  | rs1662185-A  | 2.9x10 <sup>-7</sup>   | 1.05 |              |                       |      |              |                        |
| <i>PPP1R14B</i>      | 11  | ++-+++  | rs1662185-A  | 5.3x10 <sup>-9</sup>   | 1.05 |              |                       |      |              |                        |
| <i>PRDX5</i>         | 11  | +++++++ | rs1662185-A  | 3.3x10 <sup>-297</sup> | 1.37 |              |                       |      | rs685870-T   | 5.2x10 <sup>-109</sup> |
| <i>RPS6KA4</i>       | 11  | ++++++  | rs1662185-G  | 3.0x10 <sup>-23</sup>  | 1.09 |              |                       |      | rs685870-C   | 2.3x10 <sup>-4</sup>   |
| <i>TRMT112</i>       | 11  | +++++++ | rs1662185-G  | 1.3x10 <sup>-62</sup>  | 1.15 | rs685870-C   | 9.8x10 <sup>-6</sup>  | 1.10 |              |                        |
| <i>TRPT1</i>         | 11  | ++-+++  | rs685870-C   | 6.5x10 <sup>-6</sup>   | 1.04 | rs588177-A   | 5.9x10 <sup>-19</sup> | 1.20 | rs2244625-G  | 1.2x10 <sup>-4</sup>   |
| <i>BECN1</i>         | 17  | ++++++  | rs2292749-T  | 3.9x10 <sup>-44</sup>  | 1.13 | rs2292749-C  | 1.3x10 <sup>-24</sup> | 1.12 | rs2292749-T  | 4.8x10 <sup>-19</sup>  |
| <i>FAM134C</i>       | 17  | +++++++ | rs2292749-C  | 1.8x10 <sup>-15</sup>  | 1.07 | rs66918837-G | 7.1x10 <sup>-26</sup> | 1.21 |              |                        |
| <i>HSD17B1</i>       | 17  | +--+++  | rs2292749-C  | 1.3x10 <sup>-38</sup>  | 1.12 |              |                       |      |              |                        |
| <i>HSD17B1P1</i>     | 17  | +--+++  | rs2292749-C  | 1.3x10 <sup>-11</sup>  | 1.06 |              |                       |      |              |                        |
| <i>JUP</i>           | 17  | ++----- | rs2292749-T  | 5.7x10 <sup>-14</sup>  | 1.07 |              |                       |      |              |                        |
| <i>MLX</i>           | 17  | ++++++  | rs2292749-T  | 3.8x10 <sup>-51</sup>  | 1.14 |              |                       |      |              |                        |
| <i>NAGLU</i>         | 17  | ++-+++  | rs2292749-C  | 9.0x10 <sup>-24</sup>  | 1.09 |              |                       |      |              |                        |
| <i>NT5C3B</i>        | 17  | +-----  | rs2292749-C  | 4.7x10 <sup>-11</sup>  | 1.06 |              |                       |      |              |                        |
| <i>PSMC3IP</i>       | 17  | +++++++ | rs2292749-T  | 8.1x10 <sup>-22</sup>  | 1.09 |              |                       |      |              |                        |
| <i>STAT3</i>         | 17  | +----+  | rs2292749-C  | 1.9x10 <sup>-11</sup>  | 1.06 |              |                       |      |              |                        |

Abbreviations are as follows: Chr, chromosome; NESDA, Netherlands Study of Depression and Anxiety; NTR, Netherlands Tweelingen Register. Markers are presented using their reference SNP ID along with the risk allele. pHi-C indicates whether promoter capture Hi-C contacts were identified between regions surrounding at least one of the markers in the Bayesian credible set intersection and a promoter for each gene in 7 different tissues (+: present; -: not present): lymphoblastoid, pancreas, adipose, liver, psoas, thymus, keratinocyte.

**Supplementary Table 7: Comparing PHRED-Scaled CADD Scores for eQTLs Between the Intersection of the Bayesian Credible Set and All the eQTLs for Each Gene**

| Gene          | Credible Set Intersection |      |      | All eQTLs for Gene |      |      |
|---------------|---------------------------|------|------|--------------------|------|------|
|               | N                         | Mean | SD   | N                  | Mean | SD   |
| AP003774.1    | 4                         | 4.24 | 2.61 | 1271               | 4.17 | 4.51 |
| AP003774.4    | 1                         | 5.66 | NA   | 148                | 3.13 | 3.35 |
| AP003774.6    | 4                         | 4.24 | 2.61 | 909                | 4.08 | 4.57 |
| BECN1         | 2                         | 5.19 | 6.67 | 900                | 4.13 | 4.39 |
| BLOC1S2       | 20                        | 5.9  | 5.09 | 469                | 3.67 | 3.76 |
| CCDC88B       | 4                         | 4.24 | 2.61 | 1492               | 4.07 | 4.41 |
| CEP68         | 1                         | 7.06 | NA   | 627                | 3.95 | 3.93 |
| CHUK          | 20                        | 5.90 | 5.09 | 617                | 3.62 | 3.66 |
| CWF19L1       | 20                        | 5.90 | 5.09 | 2137               | 3.78 | 3.93 |
| DNMBP         | 20                        | 5.90 | 5.09 | 520                | 3.59 | 3.62 |
| ERLIN1        | 20                        | 5.90 | 5.09 | 472                | 3.81 | 4.11 |
| FAM134C       | 2                         | 5.19 | 6.67 | 369                | 4.46 | 4.34 |
| FERMT3        | 4                         | 4.24 | 2.61 | 444                | 4.03 | 4.42 |
| <i>GPR137</i> | 4                         | 4.24 | 2.61 | 405                | 4.74 | 4.75 |
| HSD17B1       | 2                         | 5.19 | 6.67 | 536                | 4.45 | 4.33 |
| HSD17B1P1     | 2                         | 5.19 | 6.67 | 551                | 4.23 | 4.35 |
| JUP           | 2                         | 5.19 | 6.67 | 1840               | 3.88 | 4.42 |
| MLX           | 2                         | 5.19 | 6.67 | 499                | 4.14 | 4.09 |
| NAGLU         | 2                         | 5.19 | 6.67 | 517                | 4.33 | 4.11 |
| NT5C3B        | 2                         | 5.19 | 6.67 | 1961               | 3.99 | 4.30 |
| PHBP9         | 20                        | 5.90 | 5.09 | 329                | 3.78 | 3.80 |
| PKD2L1        | 20                        | 5.90 | 5.09 | 661                | 3.60 | 3.75 |
| PLA2G16       | 4                         | 4.24 | 2.61 | 2213               | 3.42 | 4.14 |
| PLCB3         | 4                         | 4.24 | 2.61 | 286                | 4.30 | 4.37 |
| PPP1R14B      | 4                         | 4.24 | 2.61 | 233                | 4.82 | 4.77 |
| PRDX5         | 4                         | 4.24 | 2.61 | 1369               | 3.97 | 4.33 |
| PSMC3IP       | 2                         | 5.19 | 6.67 | 302                | 4.67 | 4.28 |
| RP11-316M21.6 | 20                        | 5.90 | 5.09 | 184                | 3.79 | 3.87 |
| RPS6KA4       | 4                         | 4.24 | 2.61 | 1136               | 3.92 | 4.37 |
| SPRED2        | 24                        | 5.44 | 4.31 | 535                | 3.95 | 3.98 |
| STAT3         | 2                         | 5.19 | 6.67 | 1141               | 3.95 | 3.95 |
| TRMT112       | 4                         | 4.24 | 2.61 | 930                | 3.98 | 4.36 |
| <i>TRPT1</i>  | 1                         | 0.61 | NA   | 534                | 3.99 | 4.42 |

Abbreviations are as follows: N, number of eQTLs for gene; Mean, mean PHRED-Scaled CADD score of eQTLs for gene; SD, standard deviation of PHRED-Scaled CADD score of eQTLs for gene.

**Supplementary Table 8: Differential Expression for eQTL Gene Targets**

| Gene              | Chr | Psoriasis (Gudjonsson)      |               | Psoriasis (Tsoi)            |               | T2D Pancreas               |               | T2D Skeletal Muscle         |               | T2D Liver                  |               | T2D Adipose                |               |
|-------------------|-----|-----------------------------|---------------|-----------------------------|---------------|----------------------------|---------------|-----------------------------|---------------|----------------------------|---------------|----------------------------|---------------|
|                   |     | P-value                     | Log2(FC)      | P-value                     | Log2(FC)      | P-value                    | Log2(FC)      | P-value                     | Log2(FC)      | P-value                    | Log2(FC)      | P-value                    | Log2(FC)      |
| <i>ACTR2</i>      | 2   | <b>5.0x10<sup>-18</sup></b> | <b>0.884</b>  | 1.7x10 <sup>-14</sup>       | 0.566         | <b>1.6x10<sup>-2</sup></b> | <b>-1.71</b>  | <b>8.7x10<sup>-12</sup></b> | <b>0.817</b>  | 1.0x10 <sup>-2</sup>       | 0.821         | <b>2.4x10<sup>-2</sup></b> | <b>0.656</b>  |
| <i>CEP68</i>      | 2   | <b>8.7x10<sup>-31</sup></b> | <b>-1.05</b>  | <b>6.0x10<sup>-27</sup></b> | <b>-0.867</b> | 4.8x10 <sup>-2</sup>       | 0.326         | <b>1.3x10<sup>-5</sup></b>  | <b>0.591</b>  | <b>1.4x10<sup>-3</sup></b> | <b>-1.05</b>  | 8.1x10 <sup>-2</sup>       | 0.258         |
| <i>SPRED2</i>     | 2   | 1.8x10 <sup>-16</sup>       | -0.541        | 9.0x10 <sup>-4</sup>        | -0.221        | <b>5.4x10<sup>-4</sup></b> | <b>-1.19</b>  | 7.7x10 <sup>-2</sup>        | -0.092        | <b>5.9x10<sup>-3</sup></b> | <b>-1.48</b>  | 1.7x10 <sup>-1</sup>       | -0.064        |
| <i>BLOC1S2</i>    | 10  | 5.1x10 <sup>-25</sup>       | 0.400         | <b>1.5x10<sup>-15</sup></b> | <b>0.788</b>  |                            |               |                             |               |                            |               | 5.5x10 <sup>-1</sup>       | 0.080         |
| <i>CHUK</i>       | 10  | 8.7x10 <sup>-8</sup>        | 0.334         | 3.7x10 <sup>-12</sup>       | 0.480         | <b>3.1x10<sup>-4</sup></b> | <b>-1.74</b>  | 1.6x10 <sup>-6</sup>        | 0.528         | <b>2.0x10<sup>-2</sup></b> | <b>-0.975</b> | 5.4x10 <sup>-1</sup>       | 0.120         |
| <i>CWF19L1</i>    | 10  | 6.5x10 <sup>-11</sup>       | 0.297         | 1.8x10 <sup>-11</sup>       | 0.443         | 3.9x10 <sup>-1</sup>       | 0.199         |                             |               | 5.5x10 <sup>-1</sup>       | -0.398        | 8.9x10 <sup>-2</sup>       | 0.476         |
| <i>DNMBP</i>      | 10  | <b>1.4x10<sup>-28</sup></b> | <b>-0.638</b> | <b>1.6x10<sup>-21</sup></b> | <b>-0.828</b> | 2.7x10 <sup>-1</sup>       | 0.238         | 2.0x10 <sup>-1</sup>        | 0.057         | <b>1.5x10<sup>-2</sup></b> | <b>-0.815</b> | <b>2.5x10<sup>-2</sup></b> | <b>1.12</b>   |
| <i>ERLIN1</i>     | 10  | 8.0x10 <sup>-14</sup>       | 0.457         | 5.6x10 <sup>-2</sup>        | 0.114         | <b>2.7x10<sup>-3</sup></b> | <b>-0.817</b> | 1.8x10 <sup>-6</sup>        | -0.257        | 1.3x10 <sup>-1</sup>       | 0.802         | 4.5x10 <sup>-2</sup>       | 0.850         |
| <i>PHBP9</i>      | 10  |                             |               | 2.4x10 <sup>-1</sup>        | 0.210         |                            |               |                             |               |                            |               |                            |               |
| <i>PKD2L1</i>     | 10  | 6.3x10 <sup>-1</sup>        | 0.022         |                             |               | 5.3x10 <sup>-1</sup>       | 0.113         |                             |               | 7.1x10 <sup>-1</sup>       | -0.197        | 5.7x10 <sup>-1</sup>       | 0.112         |
| <i>APOO3774.1</i> | 11  |                             |               | <b>1.0x10<sup>-2</sup></b>  | <b>0.706</b>  |                            |               |                             |               |                            |               |                            |               |
| <i>CCDC88B</i>    | 11  | 5.0x10 <sup>-9</sup>        | 0.281         | <b>7.9x10<sup>-16</sup></b> | <b>1.49</b>   |                            |               |                             |               |                            |               | 2.8x10 <sup>-1</sup>       | -0.046        |
| <i>FERMT3</i>     | 11  | 4.9x10 <sup>-20</sup>       | 0.512         | <b>4.7x10<sup>-10</sup></b> | <b>0.773</b>  |                            |               |                             |               |                            |               | <b>6.6x10<sup>-3</sup></b> | <b>0.960</b>  |
| <i>GPR137</i>     | 11  | 3.8x10 <sup>-3</sup>        | 0.126         | 2.5x10 <sup>-10</sup>       | 0.516         | 7.6x10 <sup>-3</sup>       | 0.403         |                             |               | 1.8x10 <sup>-1</sup>       | 0.656         | 1.9x10 <sup>-1</sup>       | -0.190        |
| <i>PLA2G16</i>    | 11  | <b>5.5x10<sup>-13</sup></b> | <b>-0.672</b> | 1.5x10 <sup>-2</sup>        | -0.526        | <b>2.8x10<sup>-2</sup></b> | <b>-0.725</b> | 7.9x10 <sup>-2</sup>        | 0.146         | 8.7x10 <sup>-1</sup>       | 0.046         | 7.6x10 <sup>-2</sup>       | 1.35          |
| <i>PLCB3</i>      | 11  | 7.4x10 <sup>-6</sup>        | 0.217         | <b>2.5x10<sup>-17</sup></b> | <b>0.696</b>  | <b>1.2x10<sup>-5</sup></b> | <b>0.730</b>  | 7.1x10 <sup>-8</sup>        | -0.505        | 2.7x10 <sup>-1</sup>       | 0.479         | 3.4x10 <sup>-1</sup>       | 0.222         |
| <i>PPP1R14B</i>   | 11  | 2.0x10 <sup>-15</sup>       | 0.296         | 8.0x10 <sup>-9</sup>        | 0.397         | 4.9x10 <sup>-1</sup>       | -0.183        |                             |               | 3.5x10 <sup>-1</sup>       | 0.315         | <b>1.4x10<sup>-2</sup></b> | <b>0.668</b>  |
| <i>PRDX5</i>      | 11  | 2.2x10 <sup>-9</sup>        | 0.204         | <b>1.1x10<sup>-14</sup></b> | <b>0.746</b>  |                            |               |                             |               |                            |               | 8.7x10 <sup>-2</sup>       | 0.670         |
| <i>RPS6KA4</i>    | 11  | 3.7x10 <sup>-17</sup>       | 0.421         | <b>3.0x10<sup>-27</sup></b> | <b>1.42</b>   | <b>8.0x10<sup>-3</sup></b> | <b>0.664</b>  | 4.5x10 <sup>-9</sup>        | -0.317        | 8.4x10 <sup>-1</sup>       | 0.056         | 1.9x10 <sup>-1</sup>       | -0.066        |
| <i>TRMT112</i>    | 11  | 2.8x10 <sup>-22</sup>       | 0.290         | <b>5.4x10<sup>-13</sup></b> | <b>0.649</b>  | <b>4.8x10<sup>-3</sup></b> | <b>-0.677</b> |                             |               | 5.1x10 <sup>-1</sup>       | 0.155         | 7.3x10 <sup>-1</sup>       | -0.094        |
| <i>TRPT1</i>      | 11  | 4.5x10 <sup>-8</sup>        | 0.171         | 1.2x10 <sup>-9</sup>        | 0.487         |                            |               |                             |               |                            |               | 2.6x10 <sup>-1</sup>       | 0.310         |
| <i>BECN1</i>      | 17  | 6.3x10 <sup>-7</sup>        | 0.195         | 1.6x10 <sup>-13</sup>       | 0.449         | <b>3.3x10<sup>-2</sup></b> | <b>-1.05</b>  | <b>5.4x10<sup>-7</sup></b>  | <b>0.768</b>  | 6.9x10 <sup>-2</sup>       | -0.523        | 2.9x10 <sup>-2</sup>       | 0.438         |
| <i>FAM134C</i>    | 17  | 5.0x10 <sup>-2</sup>        | -0.058        | 4.5x10 <sup>-6</sup>        | 0.207         | 4.3x10 <sup>-1</sup>       | 0.178         | 2.5x10 <sup>-2</sup>        | 0.212         | 1.8x10 <sup>-1</sup>       | -0.343        | 7.6x10 <sup>-2</sup>       | 0.380         |
| <i>HSD17B1</i>    | 17  | <b>4.0x10<sup>-43</sup></b> | <b>1.43</b>   | 1.7x10 <sup>-9</sup>        | 0.564         | 2.1x10 <sup>-1</sup>       | 0.154         | <b>7.6x10<sup>-7</sup></b>  | <b>-0.622</b> | 7.3x10 <sup>-1</sup>       | -0.255        | 1.8x10 <sup>-1</sup>       | 0.144         |
| <i>HSD17B1P1</i>  | 17  |                             |               | <b>2.6x10<sup>-5</sup></b>  | <b>-0.731</b> |                            |               |                             |               |                            |               |                            |               |
| <i>JUP</i>        | 17  | 4.0x10 <sup>-11</sup>       | 0.392         | 2.7x10 <sup>-8</sup>        | 0.419         | 1.2x10 <sup>-1</sup>       | 0.378         | 1.0x10 <sup>-2</sup>        | 0.186         | 2.2x10 <sup>-1</sup>       | 0.457         | 3.5x10 <sup>-1</sup>       | 0.204         |
| <i>MLX</i>        | 17  | 1.8x10 <sup>-31</sup>       | 0.502         | 1.7x10 <sup>-12</sup>       | 0.495         | <b>6.4x10<sup>-4</sup></b> | <b>-0.804</b> | 6.3x10 <sup>-1</sup>        | 0.033         | 6.5x10 <sup>-2</sup>       | 0.691         | <b>2.7x10<sup>-2</sup></b> | <b>-0.598</b> |
| <i>NAGLU</i>      | 17  | 4.5x10 <sup>-2</sup>        | 0.073         | 1.1x10 <sup>-3</sup>        | 0.294         | 1.6x10 <sup>-1</sup>       | -0.211        | 2.9x10 <sup>-6</sup>        | -0.279        | 4.8x10 <sup>-1</sup>       | 0.223         | 8.1x10 <sup>-3</sup>       | 0.396         |
| <i>NT5C3B</i>     | 17  | 4.7x10 <sup>-1</sup>        | 0.028         | 1.8x10 <sup>-7</sup>        | 0.560         |                            |               |                             |               |                            |               | 2.6x10 <sup>-2</sup>       | 0.546         |
| <i>PSMC3IP</i>    | 17  | 1.3x10 <sup>-7</sup>        | 0.207         | <b>1.7x10<sup>-8</sup></b>  | <b>0.589</b>  | 1.2x10 <sup>-2</sup>       | 0.329         | 1.1x10 <sup>-4</sup>        | -0.212        | 7.2x10 <sup>-1</sup>       | -0.371        | 7.7x10 <sup>-2</sup>       | 0.444         |
| <i>STAT3</i>      | 17  | <b>3.0x10<sup>-35</sup></b> | <b>1.09</b>   | <b>4.6x10<sup>-28</sup></b> | <b>1.74</b>   | 4.8x10 <sup>-2</sup>       | -0.699        | 8.3x10 <sup>-2</sup>        | 0.201         | <b>1.0x10<sup>-2</sup></b> | <b>1.37</b>   | <b>3.3x10<sup>-4</sup></b> | <b>0.796</b>  |

Abbreviations are as follows: Chr, chromosome; FC, fold change. Values in **bold** indicate significant differential expression (FDR<0.05, |FC|>1)

**Supplementary Table 9: Single-Variable Mendelian Randomization**

| Approach                                         | Psoriasis on T2D |                 |              |                       |                       | T2D on Psoriasis      |                 |                       |                 |                |                       |
|--------------------------------------------------|------------------|-----------------|--------------|-----------------------|-----------------------|-----------------------|-----------------|-----------------------|-----------------|----------------|-----------------------|
|                                                  | Num. Markers     | Unadjusted OR   | Unadjusted P | BMI-adjusted OR       | BMI-adjusted P        | Num. Markers          | Unadjusted OR   | Unadjusted P          | BMI-adjusted OR | BMI-adjusted P |                       |
| <i>Established (p&lt;5x10<sup>-8</sup>) loci</i> | IVW (standard)   |                 | 1.02         | 0.139                 | 1.01                  | 0.187                 |                 | 1.06                  | 0.107           | 1.06           | 0.247                 |
|                                                  | MR-Egger         | 36/<br>36       | 1.04         | 0.196                 | 1.03                  | 0.334                 | 206/<br>148     | 1.04                  | 0.102           | 0.98           | 0.885                 |
|                                                  | Median           |                 | 1.01         | 0.260                 | 1.00                  | 0.832                 |                 | 1.03                  | 0.049           | 1.04           | 0.394                 |
|                                                  | Mode             |                 | 1.00         | 0.823                 | 0.98                  | 0.390                 |                 | 0.80                  | 0.145           | 1.17           | 0.198                 |
|                                                  | MR-RAPS          |                 | 1.02         | 0.017                 | 1.02                  | 0.061                 |                 | 1.06                  | 0.040           | 1.05           | 0.279                 |
|                                                  | IVW (standard)   |                 |              | 1.01                  | 1.38x10 <sup>-3</sup> | 1.01                  |                 | 1.59x10 <sup>-3</sup> |                 | 0.98           | 0.014                 |
| <i>Genome-wide information</i>                   | MR-Egger         | 5,877/<br>5,822 | 1.00         | 1.87x10 <sup>-3</sup> | 1.01                  | 2.16x10 <sup>-3</sup> | 4,636/<br>5,157 | 0.95                  | 0.014           | 0.94           | 5.08x10 <sup>-7</sup> |
|                                                  | Median           |                 | 1.01         | 2.27x10 <sup>-3</sup> | 1.01                  | 2.62x10 <sup>-3</sup> |                 | 1.09                  | 0.038           | 1.06           | 7.18x10 <sup>-2</sup> |
|                                                  | Mode             |                 | 1.57         | 1.06x10 <sup>-3</sup> | 3.00                  | 4.17x10 <sup>-2</sup> |                 | 1.86                  | 0.093           | 4.07           | 0.997                 |
|                                                  | MR-RAPS          |                 | 1.01         | 2.02x10 <sup>-3</sup> | 1.01                  | 2.44x10 <sup>-3</sup> |                 | 1.10                  | 0.087           | 0.93           | 9.91x10 <sup>-3</sup> |

Abbreviations are as follows: IVW, inverse variance weighted; Num., number of; T2D, type 2 diabetes; OR, odds ratio; p, p-value. Number of markers are given first using the unadjusted T2D summary statistics, and then using the BMI-adjusted summary statistics.

**Supplementary Table 10: Lead Marker in Each Locus (Which Meet Our Criteria) Using Different Approaches for Trans-Disease Meta-Analysis**

| Chr | Risk Allele Frequency |           |            |            |           |
|-----|-----------------------|-----------|------------|------------|-----------|
|     | TDMA                  | IVW       | CCMA       | RE2        | ASSET     |
| 2   | rs840967              |           |            |            |           |
| 6   |                       |           |            |            | rs9273366 |
| 10  | rs12265333            | rs7923726 | rs12265333 | rs12265333 | rs7923726 |
| 11  | rs685870              | rs1662185 | rs685870   | rs685870   |           |
| 17  | rs2292749             | rs684214  | rs684214   | rs684214   | rs684214  |

The results are largely consistent between techniques, with the chromosome 10 and 17 loci revealed by all, and all but ASSET revealing the chromosome 11 locus. Only TDMA identifies the chromosome 2 locus as significant because the lead marker for the other techniques (rs2860773) is not suggestive significant for T2D. This suggests the differences between techniques are not so much due to large changes in p-value, but rather small changes in the ordering of most significant markers. Abbreviations are as follows: Chr, chromosome; TDMA, Unweighted Trans-Disease Meta-Analysis; IVW, Inverse-Variance Weighted; CCMA, Compare and Contrast Meta-Analysis; RE2, Buhm Han’s revised random effects model for meta-analysis; ASSET, ASSociation analysis based on subSETS.

**Supplementary Table 11: Additional Loci for Trans-Disease Meta-Analysis with  $p < 1 \times 10^{-3}$  Suggestive Significance Threshold**

| Marker ID  | Chr | Position (hg19) | Alleles (risk/non-risk) | Meta-analysis P-values |                      |                       | Meta-analysis Odds Ratios |         |          | Nearby Gene   | BMI Locus? <sup>a</sup> | New GWS Locus? <sup>a</sup> |
|------------|-----|-----------------|-------------------------|------------------------|----------------------|-----------------------|---------------------------|---------|----------|---------------|-------------------------|-----------------------------|
|            |     |                 |                         | P(Psoriasis)           | P(T2D)               | P(Both)               | OR(Psoriasis)             | OR(T2D) | OR(Both) |               |                         |                             |
| rs11795343 | 9   | 32523737        | T/C                     | $5.2 \times 10^{-8}$   | $1.9 \times 10^{-4}$ | $1.4 \times 10^{-10}$ | 1.11                      | 1.03    | 1.07     | <i>DDX58</i>  | No                      | T2D                         |
| rs10761661 | 10  | 64525135        | C/T                     | $4.9 \times 10^{-6}$   | $4.1 \times 10^{-4}$ | $3.4 \times 10^{-8}$  | 1.09                      | 1.03    | 1.06     | <i>ZNF365</i> | Yes                     | T2D                         |
| rs653178   | 12  | 112007756       | C/T                     | $1.7 \times 10^{-4}$   | $9.0 \times 10^{-8}$ | $4.9 \times 10^{-8}$  | 1.07                      | 1.04    | 1.06     | <i>BRAP</i>   | Yes                     | No                          |

Abbreviations are as follows: Chr, chromosome; OR, odds ratio; p, p-value; T2D, type 2 diabetes; BMI, body mass index; GWS, genome-wide significant (i.e.  $p < 5 \times 10^{-8}$ ). <sup>a</sup>We determine whether a locus is previously known to be associated with BMI, psoriasis, or T2D according to data from the GIANT and DIAGRAM consortium, as well as a search of the available literature.

**Supplementary Table 12: Additional Shared Loci ( $p < 1 \times 10^{-3}$ ) in the Michigan Genomics Initiative**

| Marker ID  | Chr | Position (hg19) | Alleles (risk/non-risk) | Risk Allele Frequency |                  |            |       |
|------------|-----|-----------------|-------------------------|-----------------------|------------------|------------|-------|
|            |     |                 |                         | Control               | Psoriasis (only) | T2D (only) | Both  |
| rs11795343 | 9   | 32523737        | T/C                     | 0.601                 | 0.641            | 0.606      | 0.640 |
| rs10761661 | 10  | 64525135        | C/T                     | 0.567                 | 0.585            | 0.565      | 0.572 |
| rs653178   | 12  | 112007756       | C/T                     | 0.491                 | 0.523            | 0.501      | 0.536 |

Abbreviations are as follows: Chr, chromosome; T2D, type 2 diabetes.



### Supplementary Note 1: Previous reporting of shared loci

The gene targets suggested for the loci in previous research are: *CEP68* (Mahajan et al., 2018) and *SPRED2* (Xue et al., 2018) for 2p14; *CHUK* (Tsoi et al., 2017, Xue et al., 2018) for 10q24.31; *PRDX5* (Ellinghaus et al., 2012, Stuart et al., 2015) and *RPS6KA4* (Stuart et al., 2015) for 11q13.1; *MLX* (Mahajan et al., 2018), *PTRF* (Tsoi et al., 2012), *STAT3* (Tsoi et al., 2012, Xue et al., 2018), *STAT5A* (Tsoi et al., 2012) and *STAT5B* (Tsoi et al., 2012) for 17q21.2. The chromosome 2 locus has not previously been identified as genome-wide significant for psoriasis, although the surrounding D2S134 region has been suggested through linkage analysis (Trembath et al., 1997) ( $p=0.0077$ ) and is a known locus for rheumatoid arthritis (Stahl et al., 2010) ( $p=5.3 \times 10^{-10}$ ;  $OR=1.13$ ) and systemic lupus erythematosus (Bentham et al., 2015) ( $p=2.3 \times 10^{-8}$ ;  $OR=1.20$ ). The chromosome 11 locus has not previously been identified as genome-wide significant for T2D, although it was previously shown to be genome-wide significant for alopecia areata (Betz et al., 2015) ( $p=8.7 \times 10^{-14}$ ;  $OR=1.32$ ), primary biliary cirrhosis (Mells et al., 2011) ( $p=2.1 \times 10^{-10}$ ;  $OR=1.23$ ), primary sclerosing cholangitis (Ji et al., 2017) ( $p=2.2 \times 10^{-13}$ ;  $OR=1.20$ ), leprosy (Liu et al., 2015) ( $p=8.8 \times 10^{-14}$ ;  $OR=1.24$ ), Crohn's disease (Franke et al., 2010) ( $p=6.0 \times 10^{-10}$ ;  $OR=1.10$ ), multiple sclerosis (Beecham et al., 2013) ( $p=2.0 \times 10^{-9}$ ;  $OR=1.07$ ), sarcoidosis (Fischer et al., 2012) ( $p=3.2 \times 10^{-8}$ ;  $OR=1.32$ ), and vitiligo (Jin et al., 2016) ( $p=4.81 \times 10^{-8}$ ;  $OR=1.15$ ).

## **Supplementary Note 2: Patient Identification**

Patients from the Michigan Genomics Initiative (MGI) were identified as having a diagnosis of psoriasis and/or type 2 diabetes (T2D) if they had at least one of the following ICD9/10 codes, respectively:

**Psoriasis:** L40.0, L40.1, L40.2, L40.3, L40.4, L40.8, L40.9, L40.50, L40.52, L40.54, L40.53, L40.59, L40.51, 696.1, 696.0

**T2D:** E11.9, E11.22, E11.319, E11.65, E11.40, E11.42, E11.21, E11.8, E11.69, E11.621, E11.29, E11.59, E11.329, E11.359, E11.43, E11.311, E11.610, E11.49, E11.649, E11.51, E11.39, E11.351, E11.00, E11.622, E11.52, E11.331, E11.321, E11.41, E11.628, E11.339, E11.620, E11.341, E11.36, E11.01, E11.618, E11.44, E11.349, E11.638, E11.641, E11.630, E11, 250.00, 250.02, 250.60, 250.52, 250.50, 250.40, 250.80, 250.90, 250.70, 250.92, 250.62, 250.10, 250.82, 250.42, 250.72, 250.12, 250.20, 250.30, 250.22, 250.32

### Supplementary Note 3: Trans-disease meta-analysis (TDMA)

$$\beta_{PsV,T2D} = \frac{\beta_{PsV} + \beta_{T2D}}{2} \quad V_{PsV,T2D} = \frac{V_{PsV} + V_{T2D}}{4} \quad Z_{PsV,T2D} = \frac{\beta_{PsV,T2D}}{\sqrt{V_{PsV,T2D}}}$$

$\beta_{PsV}$  and  $\beta_{T2D}$  are the log odds-ratios for psoriasis vs. control and T2D vs. control meta-analyses, respectively;  $V_{PsV}$  and  $V_{T2D}$  are the corresponding variances. The meta-analysis effect size and variance

equations were derived from a weighted sum with equal weight ( $w = \frac{1}{2}$ ):  $\beta_{PsV,T2D} = E(wPsV + wT2D) = wE(PsV) + wE(T2D) = \frac{\beta_{PsV} + \beta_{T2D}}{2}$ ;  $V_{PsV,T2D} = Var(wPsV + wT2D) = Var(wPsV) + Var(wT2D) = w^2Var(PsV) + w^2Var(T2D) = \frac{V_{PsV} + V_{T2D}}{4}$ .

**Other approaches compared against:** CCMA (Baurecht et al., 2016) (Compare and Contrast Meta-Analysis), RE2 (Han and Eskin, 2011) (random effects model), and ASSET (Bhattacharjee et al., 2012) (ASsociation analysis based on subSETs).

**Colocalization:** COLOC (Giambartolomei et al., 2014) tests the following hypotheses:  $H_0$ : no association with either trait;  $H_1$ : association with T2D, not with psoriasis;  $H_2$ : Association with psoriasis, not with T2D;  $H_3$ : association with both diseases, but with different causal variants; and  $H_4$ : association with both diseases with the same causal variant. We define the posterior probability of colocalization as the posterior probability of  $H_4$ . Psoriasis/T2D colocalization was compared between the loci identified by our approach and 59 other previously identified (Bowes et al., 2015, Patrick et al., 2018, Stuart et al., 2015, Tsoi et al., 2015, Tsoi et al., 2012, Tsoi et al., 2017, Yin et al., 2015) psoriasis loci more than 500kb away. The effect sizes and standard errors of markers within +/-100kb of the lead marker for each locus were supplied as input to COLOC.

#### **Supplementary Note 4: Locus interpretation**

GARFIELD (Iotchkova et al., 2019) (GWAS Analysis of Regulatory or Functional Information Enrichment with LD correction) was used to perform enrichment analysis across >1,000 different chromatin marks and identify the cell types/tissues involved. As input data for the enrichment, all LD-independent markers (with and without the MHC) from the TDMA that were more significant than in both the individual meta-analyses were used. To further investigate the results illustrating enriched chromatin marks among immune cell types, we studied eQTLs from different databases to identify potential gene targets: eQTLGen (Vösa et al., 2018) (31,684 whole blood samples), the Gene Network blood eQTL browser (Westra et al., 2013) (5,311 peripheral blood samples), and the NESDA/NTR eQTL catalog (Jansen et al., 2017) (4,896 peripheral blood samples). We explored the impact our loci might have on these genes using results from two differential expression studies for psoriasis (58 lesional skin and 64 controls from Gudjonsson et al. (Gudjonsson et al., 2009); 28 lesional skin and 38 controls from Tsoi et al. (Tsoi et al., 2019)) in addition to four differential expression studies for type 2 diabetes: skeletal muscle (Wu et al., 2007) (15 T2D cases and 20 controls), pancreatic islets (Dominguez et al., 2011) (6 T2D cases and 7 controls), liver (Pihlajamaki et al., 2009) (4 T2D cases and 5 controls) and subcutaneous adipose (Soronen et al., 2012) under hyperinsulinemia (5 T2D cases and 5 controls). We investigated the physical interaction between the gene target enhancers and potential causal variants (from Bayesian credible sets with 95% confidence interval) using promoter capture Hi-C data in 7 tissues from 2 different sources (pancreas, adipose, liver, skeletal muscle, lymphoblastoid and thymus from Jung et al. (Jung et al., 2019) and keratinocytes from Rubin et al. (Rubin et al., 2017)). Finally, enrichment analysis was performed across protein-protein interaction (PPI) sets (Chen et al., 2012), to identify hub proteins connecting the gene targets from each locus.

## References

- Baurecht H, Hotze M, Rodriguez E, Manz J, Weidinger S, Cordell HJ, et al. Compare and Contrast Meta Analysis (CCMA): A Method for Identification of Pleiotropic Loci in Genome-Wide Association Studies. *PLoS One* 2016;11(5):e0154872.
- Beecham AH, Patsopoulos NA, Xifara DK, Davis MF, Kempainen A, Cotsapas C, et al. Analysis of immune-related loci identifies 48 new susceptibility variants for multiple sclerosis. *Nature genetics* 2013;45(11):1353-60.
- Bentham J, Morris DL, Graham DSC, Pinder CL, Tomblinson P, Behrens TW, et al. Genetic association analyses implicate aberrant regulation of innate and adaptive immunity genes in the pathogenesis of systemic lupus erythematosus. *Nature genetics* 2015;47(12):1457-64.
- Betz RC, Petukhova L, Ripke S, Huang H, Menelaou A, Redler S, et al. Genome-wide meta-analysis in alopecia areata resolves HLA associations and reveals two new susceptibility loci. *Nature communications* 2015;6:5966.
- Bhattacharjee S, Rajaraman P, Jacobs KB, Wheeler WA, Melin BS, Hartge P, et al. A subset-based approach improves power and interpretation for the combined analysis of genetic association studies of heterogeneous traits. *Am J Hum Genet* 2012;90(5):821-35.
- Bowes J, Budu-Aggrey A, Huffmeier U, Uebe S, Steel K, Hebert HL, et al. Dense genotyping of immune-related susceptibility loci reveals new insights into the genetics of psoriatic arthritis. *Nat Commun* 2015;6:6046.
- Chen EY, Xu H, Gordonov S, Lim MP, Perkins MH, Ma'ayan A. Expression2Kinases: mRNA profiling linked to multiple upstream regulatory layers. *Bioinformatics* 2012;28(1):105-11.
- Dominguez V, Raimondi C, Somanath S, Bugliani M, Loder MK, Edling CE, et al. Class II phosphoinositide 3-kinase regulates exocytosis of insulin granules in pancreatic beta cells. *The Journal of biological chemistry* 2011;286(6):4216-25.
- Ellinghaus D, Ellinghaus E, Nair RP, Stuart PE, Esko T, Metspalu A, et al. Combined analysis of genome-wide association studies for Crohn disease and psoriasis identifies seven shared susceptibility loci. *American journal of human genetics* 2012;90(4):636-47.
- Fischer A, Schmid B, Ellinghaus D, Nothnagel M, Gaede KI, Schurmann M, et al. A novel sarcoidosis risk locus for Europeans on chromosome 11q13.1. *American journal of respiratory and critical care medicine* 2012;186(9):877-85.
- Franke A, McGovern DP, Barrett JC, Wang K, Radford-Smith GL, Ahmad T, et al. Genome-wide meta-analysis increases to 71 the number of confirmed Crohn's disease susceptibility loci. *Nature genetics* 2010;42(12):1118-25.
- Giambartolomei C, Vukcevic D, Schadt EE, Franke L, Hingorani AD, Wallace C, et al. Bayesian test for colocalisation between pairs of genetic association studies using summary statistics. *PLoS Genet* 2014;10(5):e1004383.
- Gudjonsson JE, Ding J, Li X, Nair RP, Tejasvi T, Qin ZS, et al. Global gene expression analysis reveals evidence for decreased lipid biosynthesis and increased innate immunity in uninvolved psoriatic skin. *The Journal of investigative dermatology* 2009;129(12):2795-804.
- Han B, Eskin E. Random-effects model aimed at discovering associations in meta-analysis of genome-wide association studies. *Am J Hum Genet* 2011;88(5):586-98.
- Iotchkova V, Ritchie GRS, Geihs M, Morganella S, Min JL, Walter K, et al. GARFIELD classifies disease-relevant genomic features through integration of functional annotations with association signals. *Nature genetics* 2019;51(2):343-53.
- Jansen R, Hottenga JJ, Nivard MG, Abdellaoui A, Laport B, de Geus EJ, et al. Conditional eQTL analysis reveals allelic heterogeneity of gene expression. *Human molecular genetics* 2017;26(8):1444-51.

- Ji SG, Juran BD, Mucha S, Folseraas T, Jostins L, Melum E, et al. Genome-wide association study of primary sclerosing cholangitis identifies new risk loci and quantifies the genetic relationship with inflammatory bowel disease. *Nature genetics* 2017;49(2):269-73.
- Jin Y, Andersen G, Yorgov D, Ferrara TM, Ben S, Brownson KM, et al. Genome-wide association studies of autoimmune vitiligo identify 23 new risk loci and highlight key pathways and regulatory variants. *Nature genetics* 2016;48(11):1418-24.
- Jung I, Schmitt A, Diao Y, Lee AJ, Liu T, Yang D, et al. A compendium of promoter-centered long-range chromatin interactions in the human genome. *Nature genetics* 2019;51(10):1442-9.
- Liu H, Irwanto A, Fu X, Yu G, Yu Y, Sun Y, et al. Discovery of six new susceptibility loci and analysis of pleiotropic effects in leprosy. *Nature genetics* 2015;47(3):267-71.
- Mahajan A, Wessel J, Willems SM, Zhao W, Robertson NR, Chu AY, et al. Refining the accuracy of validated target identification through coding variant fine-mapping in type 2 diabetes. *Nature genetics* 2018;50(4):559-71.
- Mells GF, Floyd JA, Morley KI, Cordell HJ, Franklin CS, Shin SY, et al. Genome-wide association study identifies 12 new susceptibility loci for primary biliary cirrhosis. *Nature genetics* 2011;43(4):329-32.
- Patrick MT, Stuart PE, Raja K, Gudjonsson JE, Tejasvi T, Yang J, et al. Genetic signature to provide robust risk assessment of psoriatic arthritis development in psoriasis patients. *Nat Commun* 2018;9(1):4178.
- Pihlajamaki J, Boes T, Kim EY, Dearie F, Kim BW, Schroeder J, et al. Thyroid hormone-related regulation of gene expression in human fatty liver. *The Journal of clinical endocrinology and metabolism* 2009;94(9):3521-9.
- Rubin AJ, Barajas BC, Furlan-Magaril M, Lopez-Pajares V, Mumbach MR, Howard I, et al. Lineage-specific dynamic and pre-established enhancer-promoter contacts cooperate in terminal differentiation. *Nature genetics* 2017;49(10):1522-8.
- Soronen J, Laurila PP, Naukkarinen J, Surakka I, Ripatti S, Jauhiainen M, et al. Adipose tissue gene expression analysis reveals changes in inflammatory, mitochondrial respiratory and lipid metabolic pathways in obese insulin-resistant subjects. *BMC medical genomics* 2012;5:9.
- Stahl EA, Raychaudhuri S, Remmers EF, Xie G, Eyre S, Thomson BP, et al. Genome-wide association study meta-analysis identifies seven new rheumatoid arthritis risk loci. *Nature genetics* 2010;42(6):508-14.
- Stuart PE, Nair RP, Tsoi LC, Tejasvi T, Das S, Kang HM, et al. Genome-wide Association Analysis of Psoriatic Arthritis and Cutaneous Psoriasis Reveals Differences in Their Genetic Architecture. *American journal of human genetics* 2015;97(6):816-36.
- Trembath RC, Clough RL, Rosbotham JL, Jones AB, Camp RD, Frodsham A, et al. Identification of a major susceptibility locus on chromosome 6p and evidence for further disease loci revealed by a two stage genome-wide search in psoriasis. *Human molecular genetics* 1997;6(5):813-20.
- Tsoi LC, Rodriguez E, Degenhardt F, Baurecht H, Wehkamp U, Volks N, et al. Atopic Dermatitis Is an IL-13-Dominant Disease with Greater Molecular Heterogeneity Compared to Psoriasis. *The Journal of investigative dermatology* 2019;139(7):1480-9.
- Tsoi LC, Spain SL, Ellinghaus E, Stuart PE, Capon F, Knight J, et al. Enhanced meta-analysis and replication studies identify five new psoriasis susceptibility loci. *Nat Commun* 2015;6:7001.
- Tsoi LC, Spain SL, Knight J, Ellinghaus E, Stuart PE, Capon F, et al. Identification of 15 new psoriasis susceptibility loci highlights the role of innate immunity. *Nat Genet* 2012;44(12):1341-8.
- Tsoi LC, Stuart PE, Tian C, Gudjonsson JE, Das S, Zawistowski M, et al. Large scale meta-analysis characterizes genetic architecture for common psoriasis associated variants. *Nature communications* 2017;8:15382.

- Võsa U, Claringbould A, Westra H-J, Bonder MJ, Deelen P, Zeng B, et al. Unraveling the polygenic architecture of complex traits using blood eQTL metaanalysis. *bioRxiv* 2018:447367.
- Westra HJ, Peters MJ, Esko T, Yaghootkar H, Schurmann C, Kettunen J, et al. Systematic identification of trans eQTLs as putative drivers of known disease associations. *Nature genetics* 2013;45(10):1238-43.
- Wu X, Wang J, Cui X, Maianu L, Rhee B, Rosinski J, et al. The effect of insulin on expression of genes and biochemical pathways in human skeletal muscle. *Endocrine* 2007;31(1):5-17.
- Xue A, Wu Y, Zhu Z, Zhang F, Kemper KE, Zheng Z, et al. Genome-wide association analyses identify 143 risk variants and putative regulatory mechanisms for type 2 diabetes. *Nature communications* 2018;9(1):2941.
- Yin X, Low HQ, Wang L, Li Y, Ellinghaus E, Han J, et al. Genome-wide meta-analysis identifies multiple novel associations and ethnic heterogeneity of psoriasis susceptibility. *Nat Commun* 2015;6:6916.
